# Supplementary material for: Increased Intensity and Frequency of Global Coastal Compound Wind and Precipitation Extremes: Implications for Sea Level Anomalies
Source: Copernicus journal article supplement (doi:10.5194/egusphere-2024-3799), 2025-01-20
Supplement: Supplementary file 1 [file egusphere-2024-3799-supplement.pdf]

1 Supporting Information for

2 **Increased Intensity and Frequency of Global Coastal Compound Wind and**  
3 **Precipitation Extremes: Implications for Sea Level Anomalies**

4

5 Xinlong Zhang<sup>1</sup>, Jiayi Fang<sup>2</sup>, Yue Qin<sup>3</sup>, Weiping Wang<sup>4, \*</sup>, Ping Shen<sup>5, \*</sup>

6

7 <sup>1</sup> State Key Laboratory of Internet of Things for Smart City and Department of Civil  
8 and Environmental Engineering, University of Macau, Macao SAR, People's  
9 Republic of China

10 <sup>2</sup> Institute of Remote Sensing and Earth Sciences, Hangzhou Normal University,  
11 Hangzhou, Zhejiang, People's Republic of China

12 <sup>3</sup> College of Environmental Sciences and Engineering, Peking University, Beijing,  
13 People's Republic of China

14 <sup>4</sup> School of National Safety and Emergency Management, Beijing Normal University,  
15 Zhuhai, Guangdong, People's Republic of China

16 <sup>5</sup> State Key Laboratory of Internet of Things for Smart City and Department of Ocean  
17 Science and Technology, University of Macau, Macao SAR, People's Republic of  
18 China

19

20 \*Corresponding authors. Ping Shen: pingshen@um.edu.mo; Weiping Wang:  
21 wpwang@bnu.edu.cn

22

23 **Contents of this file**

24 Figure S1 to S5

25 Table S1

26

27 **Introduction**

28 This supplementary information (SI) includes one table and five figures, which  
29 provide supplements to or evaluation of the data sets, and results in the main paper.

30

31

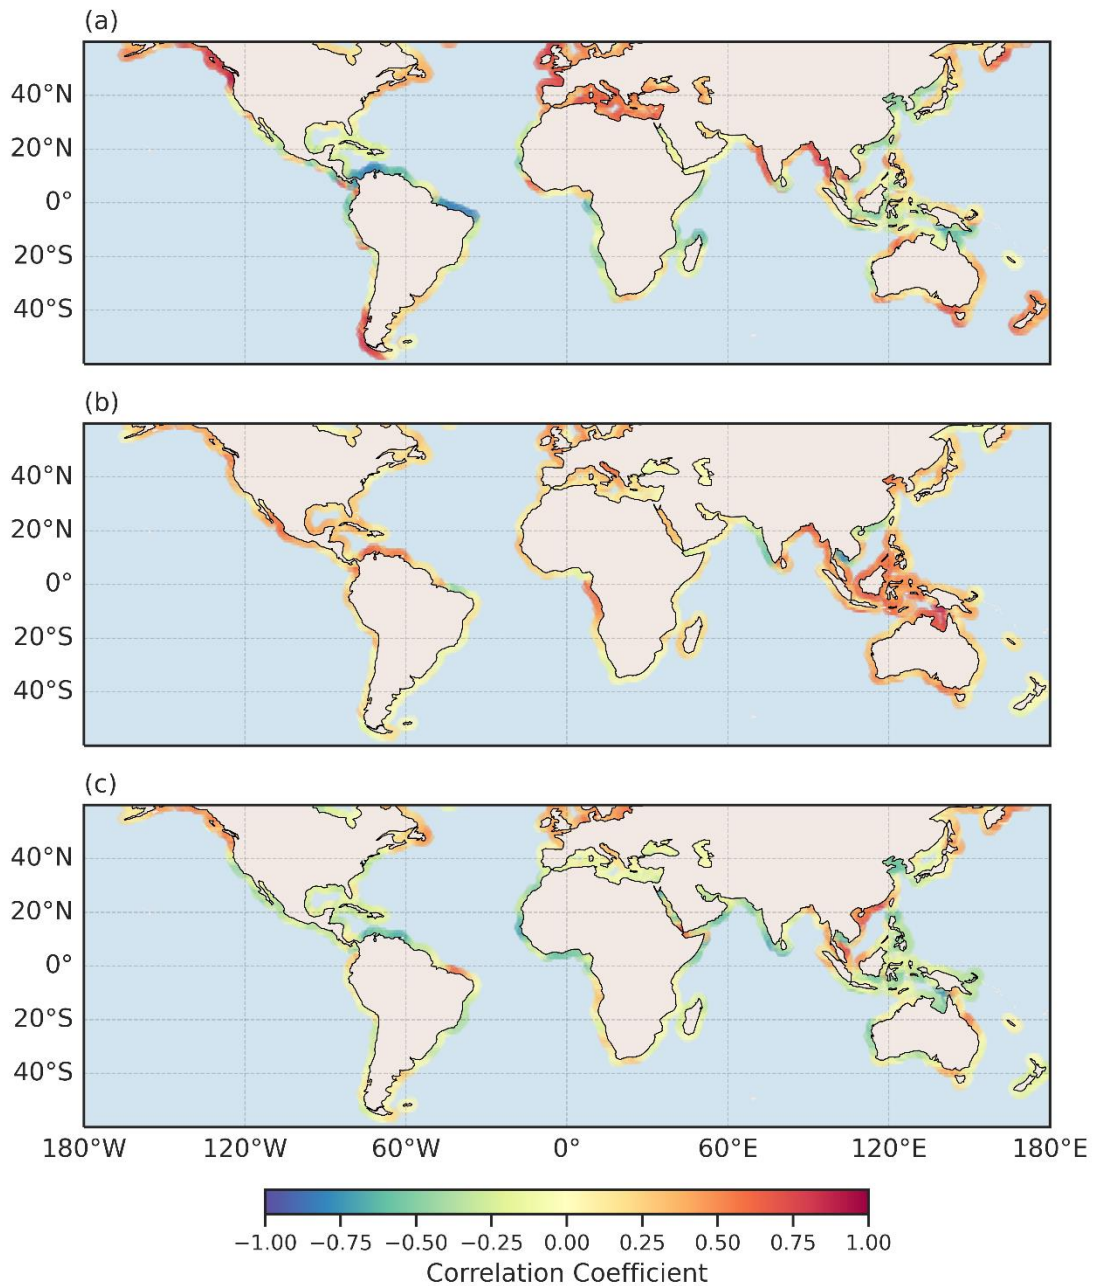

33

34 *Fig. S1 The global map of the correlation coefficients for the historical period (1993–*  
 35 *2020).*

36 *(a) For correlation coefficient between precipitation and wind. (b) For correlation*  
 37 *coefficient between precipitation and sea level anomalies (SLA). (c) For correlation*  
 38 *coefficient between wind and SLA.*

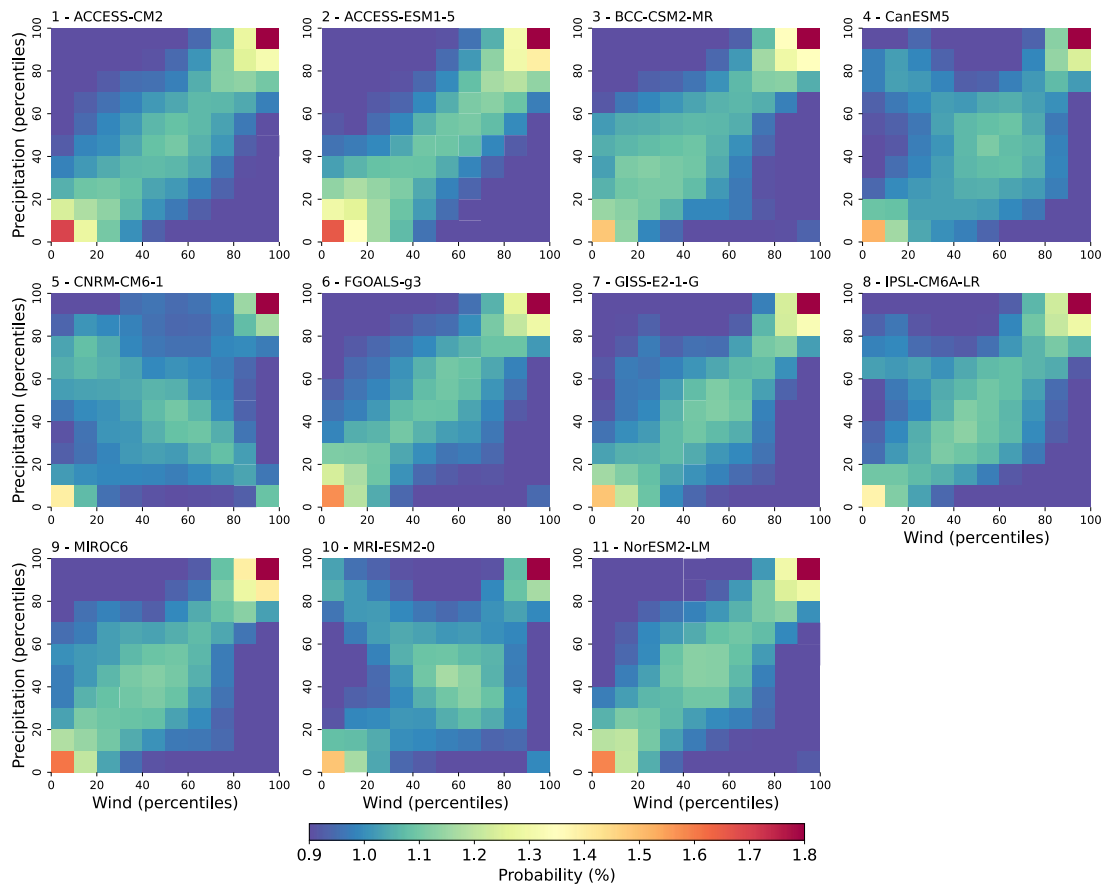

39

40 *Fig. S2 Distribution of precipitation and wind speed in historical simulations (1940-*  
 41 *2014).*

42 *The probabilities shown in each percentile bin for precipitation and wind speed were*  
 43 *calculated as the average probability for all grid cells in each model.*

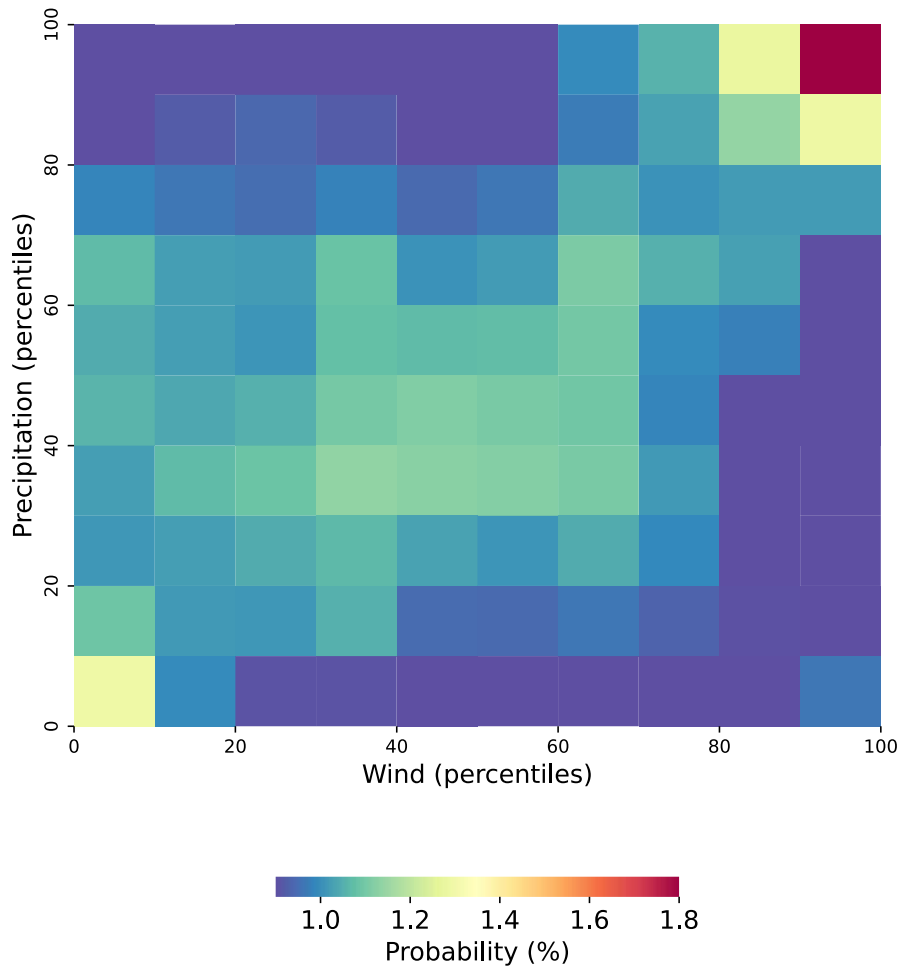

44

45 *Fig. S3* Coupling of precipitation and wind and their effect on coastal sea level  
 46 anomalies on the observed data (1993-2014). Average probability of each percentile  
 47 bin for precipitation and wind.

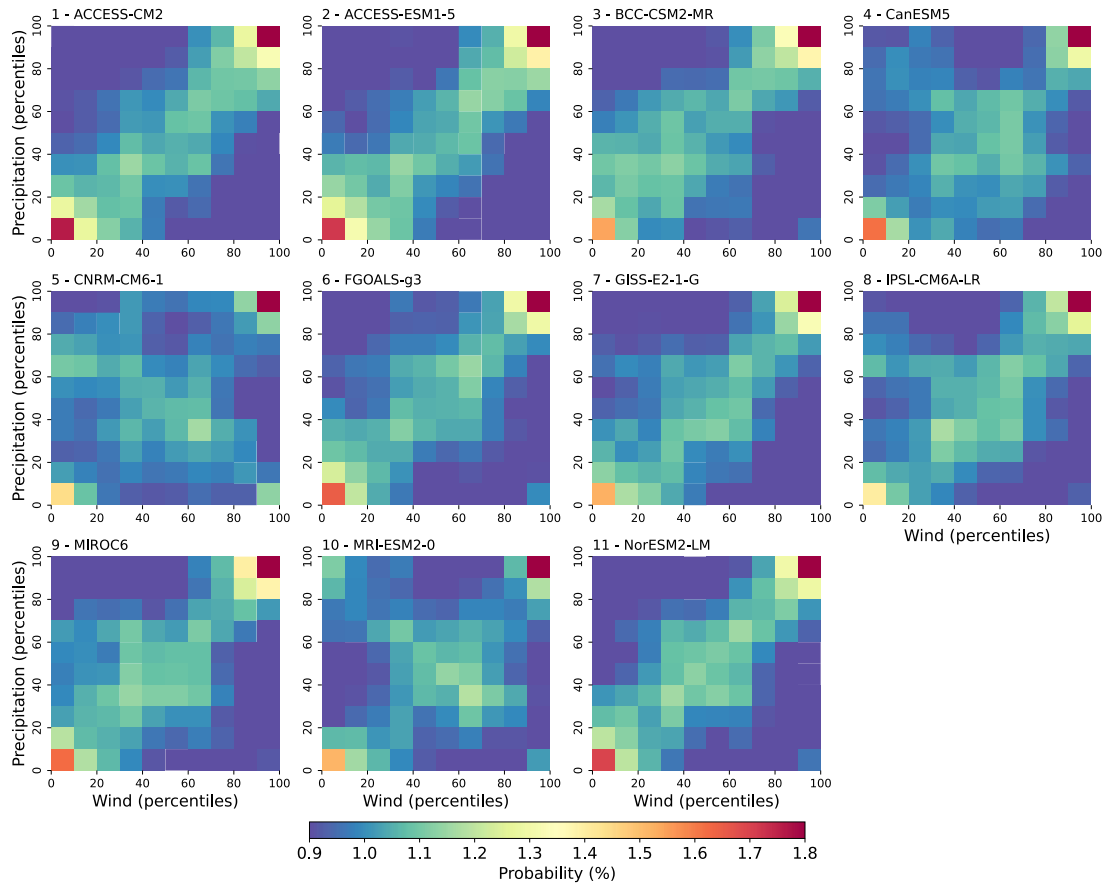

48

49 *Fig. S4 Distribution of precipitation and wind speed in historical simulations (1993-*  
 50 *2014).*

51 *The probabilities shown in each percentile bin for precipitation and wind speed were*  
 52 *calculated as the average probability for all grid cells in each model.*

53

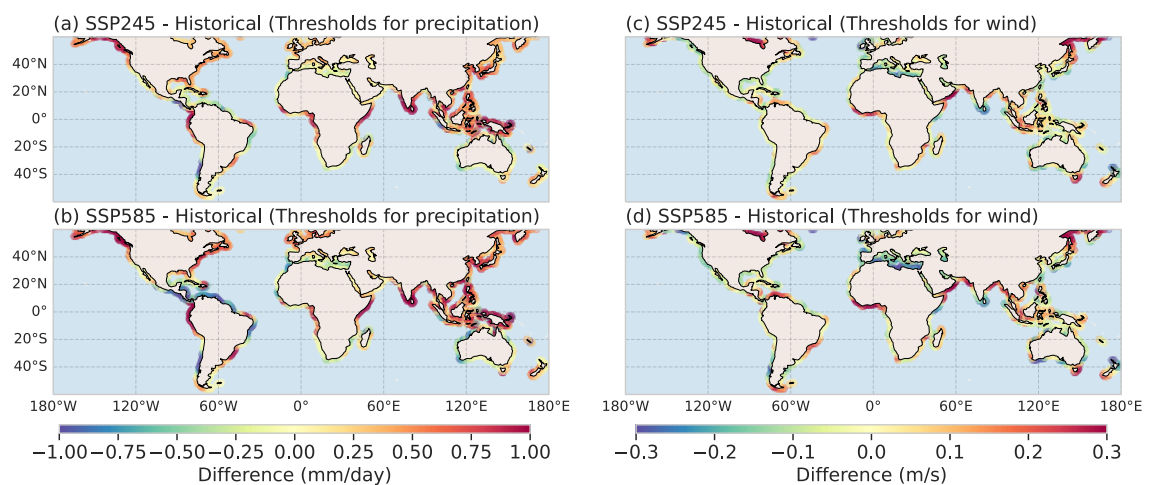

54

55 *Fig. S5. Comparison of historical and future simulated precipitation and wind speed*  
 56 *thresholds.*

57 *Differences in precipitation and wind speed thresholds for the two periods (future*

58 *thresholds - historical thresholds.)*

59

60 Table S1 The CMIP6 models involved in this study.

61

62 This table summarizes the Coupled Model Intercomparison Project Phase 6

| Model         | Ensemble | Institution, Country |
|---------------|----------|----------------------|
| ACCESS-CM2    | r1i1p1f1 | ACCESS, Australia    |
| ACCESS-ESM1-5 | r1i1p1f1 | ACCESS, Australia    |
| BCC-CSM2-MR   | r1i1p1f1 | BBC, CMA, China      |
| CanESM5       | r1i1p1f1 | CCCMA, Canada        |
| CNRM-CM6-1    | r1i1p1f2 | CNRM-CERFACS, France |
| FGOALS-g3     | r1i1p1f1 | IAP, CAS, China      |
| GISS-E2-1-G   | r1i1p1f2 | GISS, United States  |
| IPSL-CM6A-LR  | r1i1p1f1 | IPSL, France         |
| MIROC6        | r1i1p1f1 | MIROC, Japan         |
| MRI-ESM2-0    | r1i1p1f1 | MPI, Germany         |
| NorESM2-LM    | r1i1p1f1 | NCC, Norway          |

63 (CMIP6) models used in our study to project compound extreme wind and  
64 precipitation events in global coastal areas. CMIP6 is the latest generation of climate  
65 models that provide a comprehensive set of simulations for a wide range of climate  
66 variables under different scenarios of future greenhouse gas emissions and land use  
67 changes.

68 The models listed in Table S1 represent a diverse set of modeling centers from  
69 around the world, including Australia (ACCESS), China (BCC-CSM2-MR,  
70 FGOALS-g3), Canada (CanESM5), France (CNRM-CM6-1, IPSL-CM6A-LR), the  
71 United States (GISS-E2-1-G), Japan (MIROC6), Germany (MRI-ESM2-0), and  
72 Norway (NorESM2-LM). Each model has its unique characteristics in terms of model  
73 physics, resolution, and parameterizations, which contribute to the ensemble of  
74 projections used in our analysis.

75 By utilizing these CMIP6 models, we aim to provide a robust assessment of the  
76 potential changes in compound extreme wind and precipitation events in global  
77 coastal areas under different future scenarios. The inclusion of multiple models allows  
78 us to account for uncertainties in the projections and to identify robust signals across  
79 different modeling frameworks.
